# Supplementary material
Source: PubMed Central journal article supplement (PMC5510485)
Supplement: NIHMS872012-supplement-3.pdf [file NIHMS872012-supplement-3.pdf]

## Supplemental Information

# Skilled movements require non-apoptotic Bax/Bak pathway-mediated corticospinal circuit reorganization

Zirong Gu, Najet Serradj, Masaki Ueno, Mishi Liang, Jie Li, Mark L. Baccei, John H. Martin,  
and Yutaka Yoshida

### Supplementary Information For this Manuscript includes the following:

Figure S1. Time-course of PRV tracing in descending pathways (related to Figure 1)

Figure S2. CS neurons labeled by PRVs are restricted to the motor cortex (related to Figure 1)

Figure S3. A dual-color PRV tracing experiment from a pair of antagonistic hindlimb muscles (related to Figures 1 and 2)

Figure S4. Activation of caspase-3 in descending CS axons during CS circuit development (related to Figure 4)

Figure S5. Axonal localized activation of caspase-3 requires Bax and Bak (related to Figure 4)

Figure S6. No obvious defects in cortico-cortical axonal tracts in *Bax<sup>fl/fl</sup>*; *Bak<sup>-/-</sup>-AAV1-Cre* mice (related to Figure 4)

Figure S7. No obvious defects in IN-MN connectivity in *Bax<sup>fl/fl</sup>*; *Bak<sup>-/-</sup>-AAV1-Cre* (related to Figure 6)

Figure S8. Normal neuronal excitability in Bax/Bak-deficient CS neurons (related to Figure 7)

Movies S1 and S2. Representative movies showing the performance of adult *Bax<sup>fl/+</sup>*; *Bak<sup>+/-</sup>-AAV1-Cre* and *Bax<sup>fl/fl</sup>*; *Bak<sup>-/-</sup>-AAV1-Cre* mice on the reaching test (related to Figure 8)

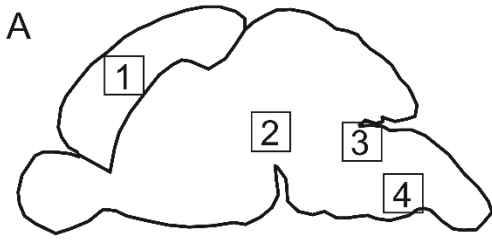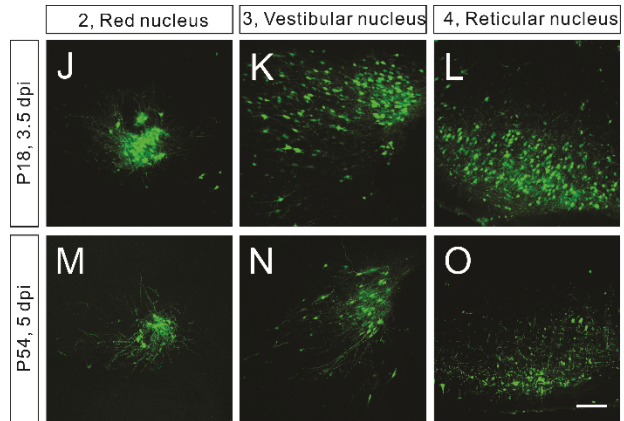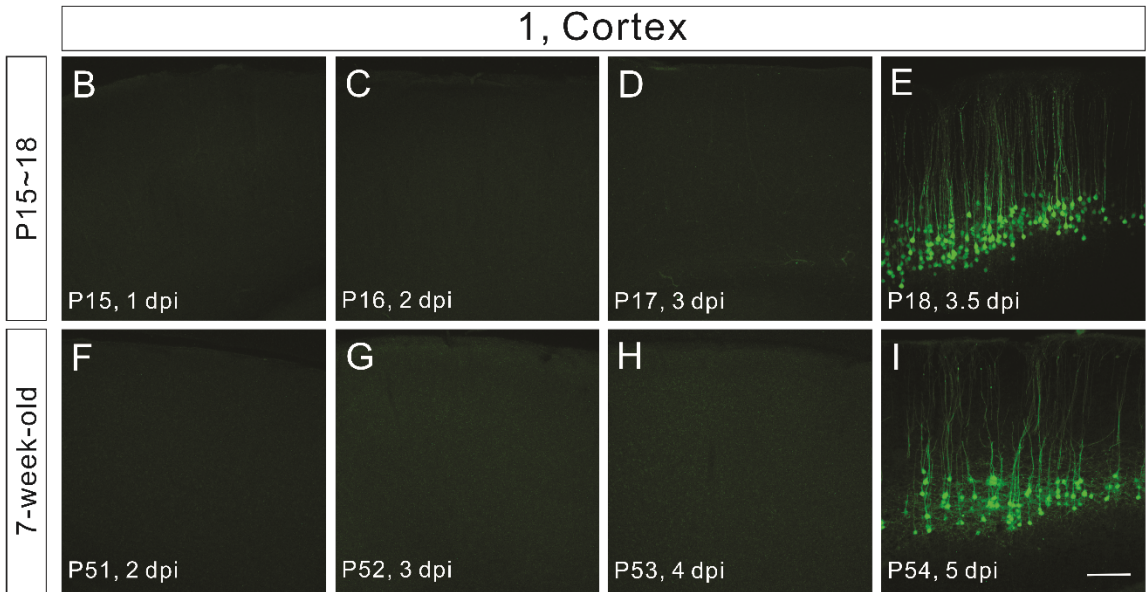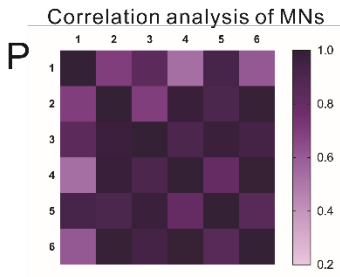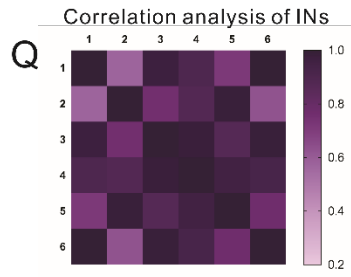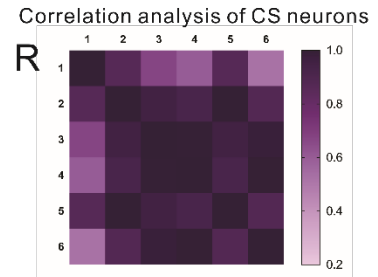

**S** Forelimb, postnatal

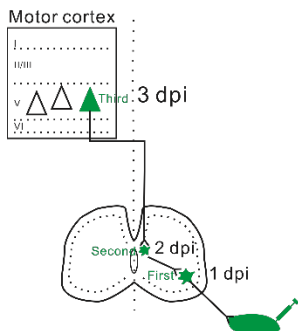

**T** Hindlimb, postnatal

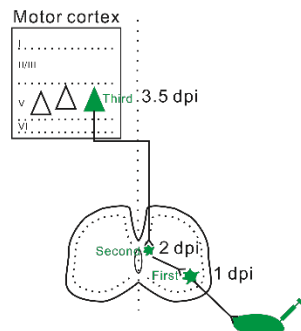

**U** Forelimb, adult

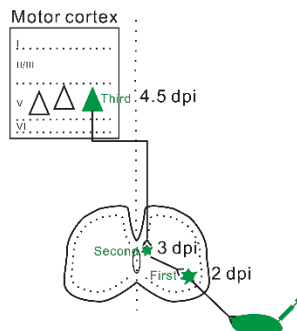

**V** Hindlimb, adult

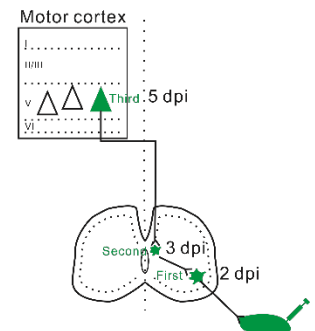

**Figure S1. Time-course of PRV tracing in descending pathways (related to Figure 1)**

(A) Sagittal view of a brain section showing origins of different descending pathways: 1) the CS pathway; 2) the rubrospinal pathway; 3) the vestibulospinal pathway; and 4) the medullary reticulospinal pathway.

(B–I) Representative images of sagittal brain sections from P15~18 (B–E) and P51~54 adult (F–I) mice with PRV-eGFP injected into the Rf muscle. PRV-eGFP was only detected at 3.5 (E) and 5 (I) dpi in early postnatal and adult mice, respectively.

(J–O) Sagittal brain sections showing the labeling of the red nucleus (J and M), vestibular nucleus (K and N), and reticular nuclei (L and O) in P18 (n=8) and P54 (n=5) mice.

(P–R) Correlation analysis showing numbers of MNs, INs, and CS neurons labeled by PRV-eGFP injected into the Rf muscle at P15~18 across six different animals. Numbers of PRV-labeled neurons are highly correlated from different cases. Color scale to the right indicates correlation values.

(S–V) Summary of the PRV-tracing time course in early postnatal and adult mice (n=5~8 mice for each condition). Where “n” represents the number of mice used in each experiment. Scale bars, 200  $\mu$ m (I and O).

PRV-eGFP/Ctip2

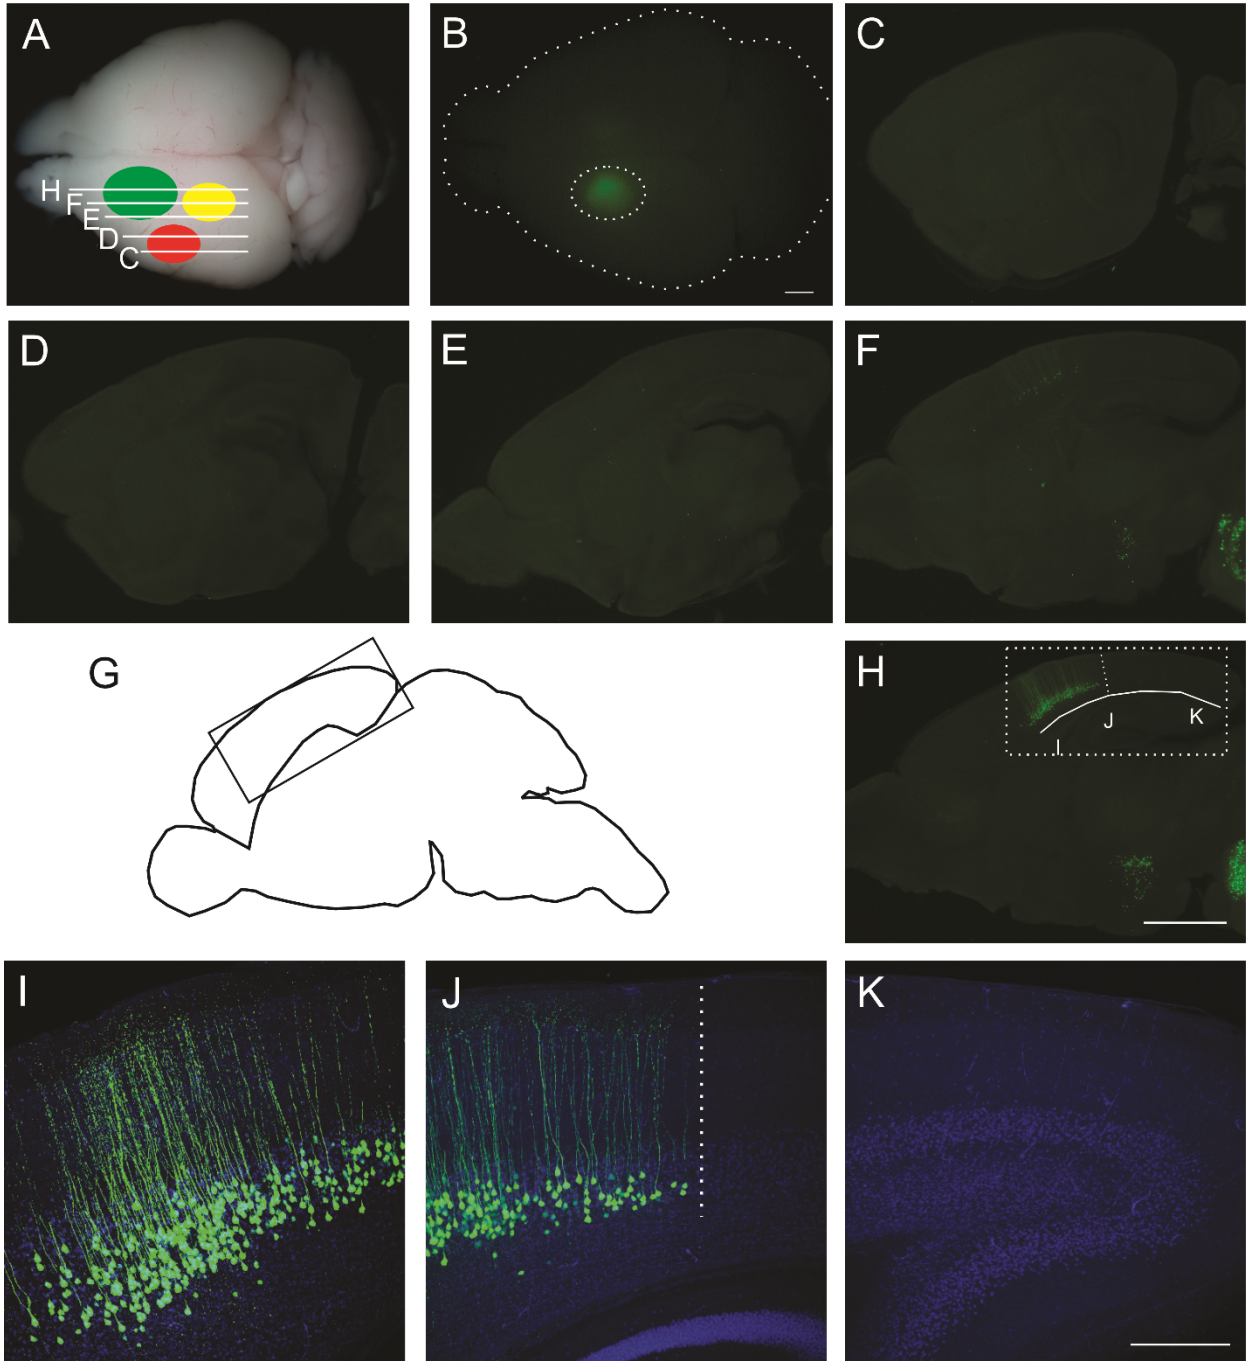

**Figure S2. CS neurons labeled by PRVs are restricted to the motor cortex (related to Figure 1)**

(A–B) Representative images of a brain from mice injected with PRV-eGFP into the Rf muscle (n=8) at P18. (A) Locations of different cortical areas (motor cortex, green oval; sensory cortex, red oval; visual cortex, yellow oval). (B) Selective labeling of the motor cortex by PRV-eGFP (dotted oval).

(C–F and H) Representative sagittal brain sections showing neurons labeled by PRV-eGFP. Most PRV-eGFP<sup>+</sup> CS neurons are located at the center of the motor cortex (white dotted rectangle in H). Note the absence of PRV-eGFP<sup>+</sup> neurons in the sensory cortex (C–E).

(G) Schematic of sagittal brain section, illustrating the location of the motor cortex and the adjacent cortical areas (black rectangle).

(I–K) Magnified views of boxed area in (H) showing the restriction of PRV-eGFP labeled CS neurons to the motor cortex (note: PRV-eGFP<sup>+</sup> CS neurons also express Ctip2 (blue)). PRV-eGFP is restricted to the motor cortex (I and J) and is absent from the visual cortex (K) (the border between the motor and visual cortices is indicated by the white dotted line in J). Where “n” represents the number of mice used in each experiment. Scale bars, 200  $\mu\text{m}$  (K), 500  $\mu\text{m}$  (H) and 1 mm (B).

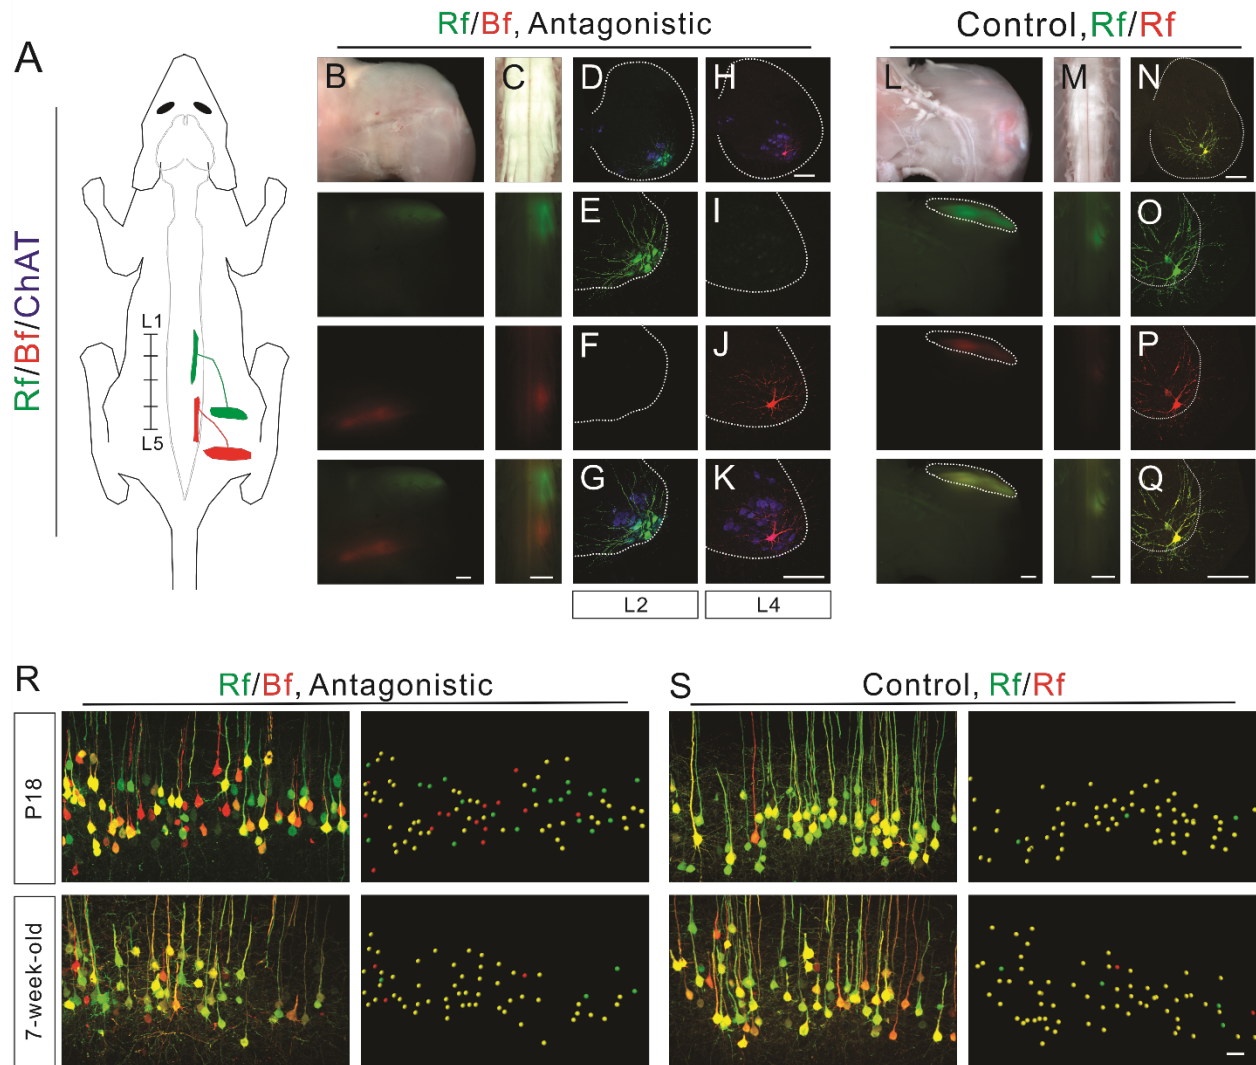

**Figure S3. A dual-color PRV tracing experiment from a pair of antagonistic hindlimb muscles (related to Figures 1 and 2)**

(A) Diagram illustrating motor neuron pools labeled by retrograde tracing from a pair of antagonistic muscles in the hindlimb, Rf (PRV-eGFP) and Bf (PRV-RFP).

(B and C) Color (top one) and fluorescent (bottom three) images of hindlimb muscles (B) and spinal cords (C) at 2 dpi (n=5).

(D–K) Transverse spinal cord sections showing the labeling of PRV-eGFP<sup>+</sup> Rf and PRV-RFP<sup>+</sup> Bf motor neurons in ChAT<sup>+</sup> (blue) motor neuron pools at lumbar levels 2 (D–G) and 4 (H–K) at 1 dpi, respectively. When we injected two color variants of PRVs to different muscles including (Rf/Bf), we never observed double labeled-cells in muscles and MNs (data not shown), indicating that injected PRVs are restricted to a specific muscle.

(L–M) Color (top one) and fluorescent (bottom three) images of hindlimb muscles (L) and spinal cords (M) at 2 dpi (n=6) from a control experiment in which a mixture of PRV-eGFP and PRV-RFP was injected into the Rf muscle at P14. Note the viruses were restricted to the target muscle (indicated by the white dashed circles in figures under L).

(N–Q) Transverse lumbar spinal cord sections showing labeling of PRV-eGFP<sup>+</sup> and PRV-RFP<sup>+</sup> Rf motor neurons at 1 dpi (n=5).

(R) Representative images of CS neurons labeled by dual-color PRV tracing from the Rf/Bf muscle pair at early postnatal (top, n=6) and adult (bottom, n=6) stages.

(S) Representative images of CS neurons labeled by injections of the PRV-eGFP and PRV-RFP mixture into the Rf muscle at postnatal (top, n=3) and adult (bottom, n=6) stages. Where “n” represents the number of mice used in each experiment. Scale bars, 50  $\mu$ m (S), 200  $\mu$ m (K and Q), and 1 mm (B, C, L, and M).

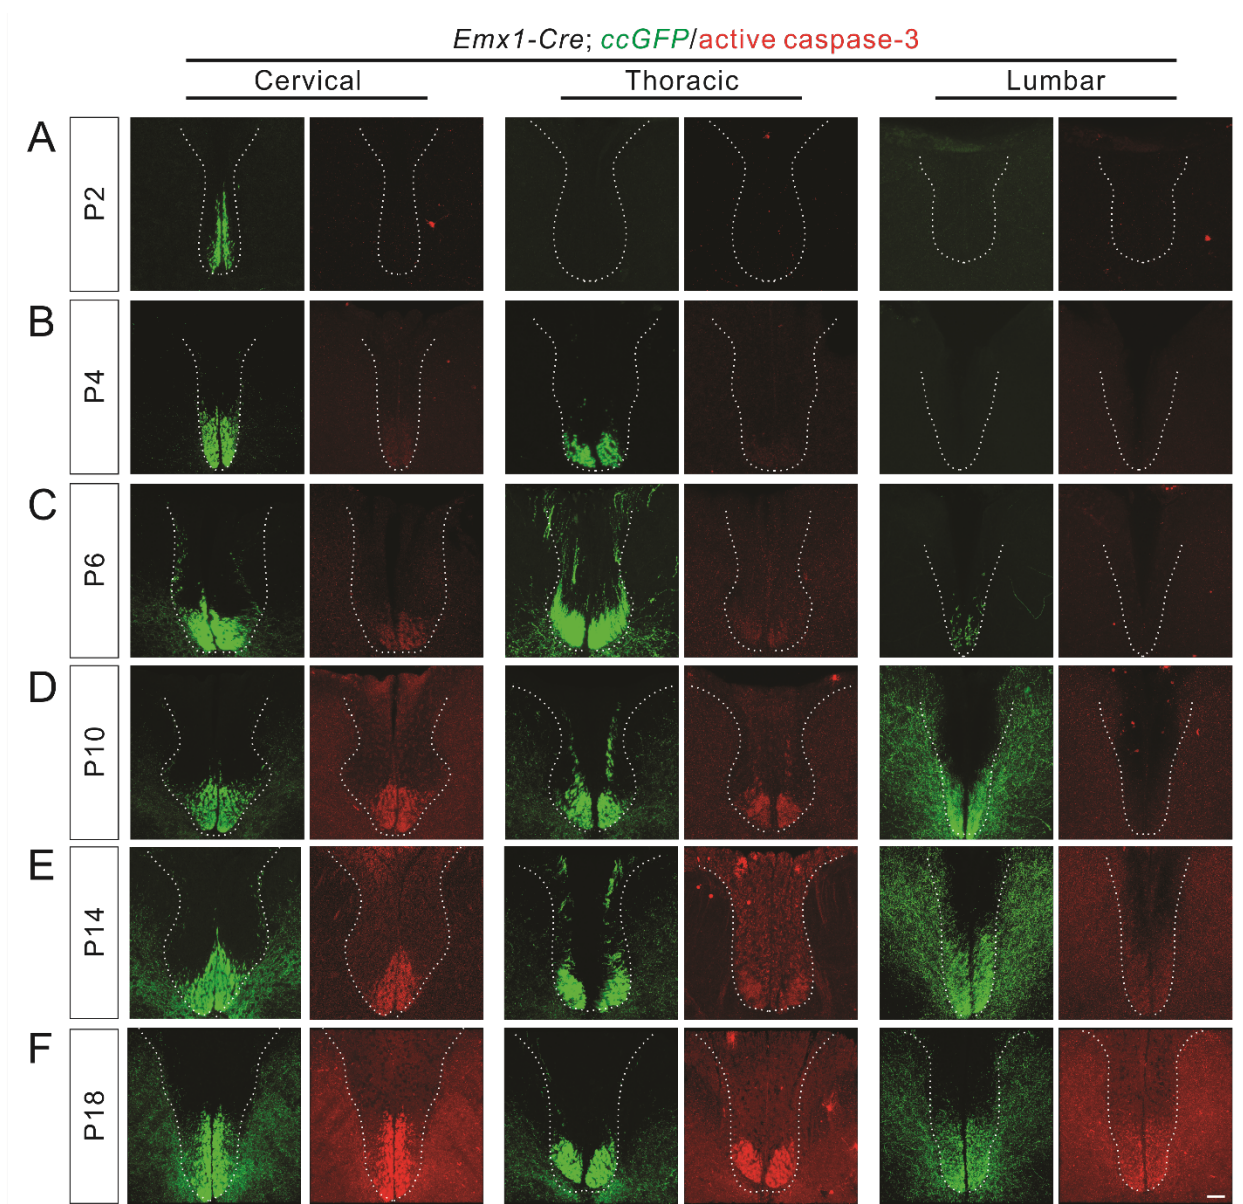

**Figure S4. Activation of caspase-3 in descending CS axons during CS circuit development (related to Figure 4)**

(A–F) Expression of active caspase-3 (red) in CS axons (green) within the dorsal funiculus (indicated by white dashed lines) of cervical, thoracic, and lumbar spinal cords from P2 (A), P4 (B), P6 (C), P10 (D), P14 (E), and P18 (F) *Emx1-Cre; ccGFP* mice (n=3 mice for each stage). Scale bar, 50  $\mu$ m (F).



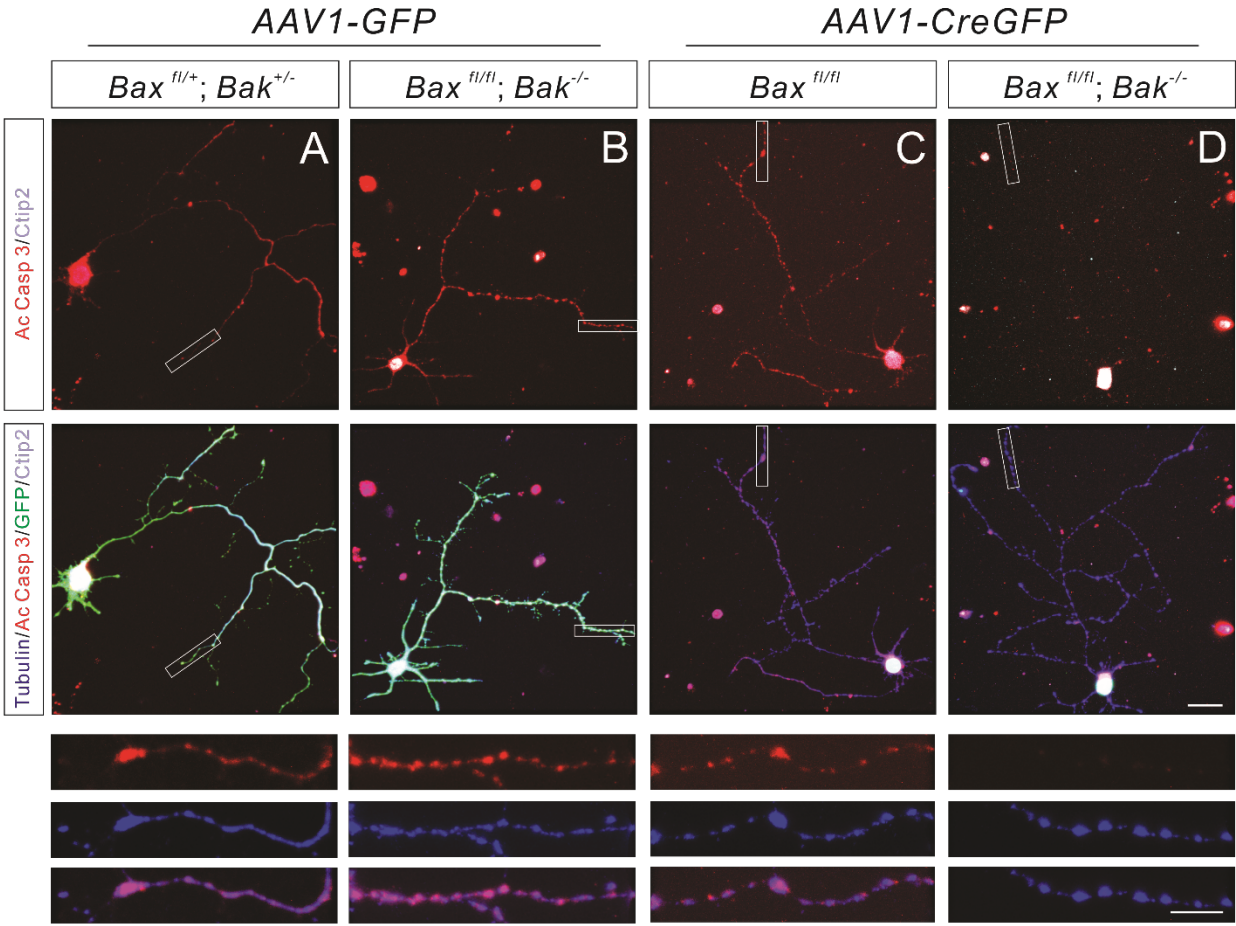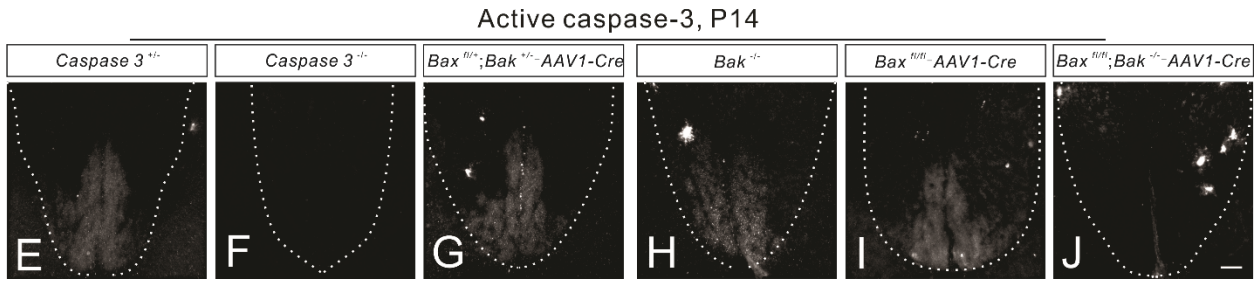

**Figure S5. Axonal localized activation of caspase-3 requires Bax and Bak (related to Figure 4)**

(A–D) Immunostaining of cultured cortical neurons (7 days *in vitro*) from  $Bax^{fl/fl}$ ,  $Bax^{fl/+}$ ;  $Bak^{+/-}$ , and  $Bax^{fl/fl}$ ;  $Bak^{-/-}$  mice showing GFP (green), active caspase-3 (red), Tubulin (blue), and Ctip2 (gray). *AAVI-CreGFP* was used to deliver Cre recombinase, and *AAVI-GFP* was used as a control. Note, CreGFP is a fusion protein and is restricted to the nucleus.

(E–J) Expression of active caspase-3 in the dorsal funiculus (indicated by white dashed lines) of cervical spinal cords from P14 *caspase-3*<sup>+/-</sup> (E), *caspase-3*<sup>-/-</sup> (F),  $Bax^{fl/+}$ ;  $Bak^{+/-}$ -*AAVI-Cre* (G),  $Bak^{-/-}$  (H),  $Bax^{fl/fl}$ -*AAVI-Cre* (I), and  $Bax^{fl/fl}$ ;  $Bak^{-/-}$ -*AAVI-Cre* (J) mice (n=3 mice for each genotype). Scale bars, 20  $\mu$ m (magnified view of D), and 50  $\mu$ m (D and J).

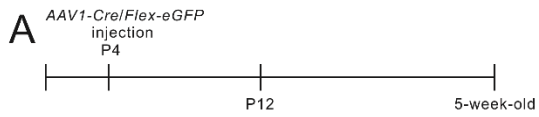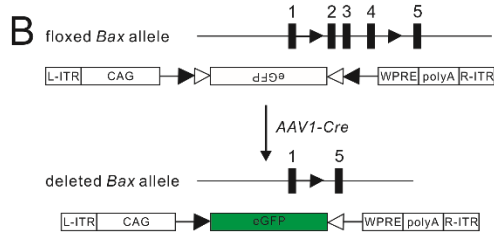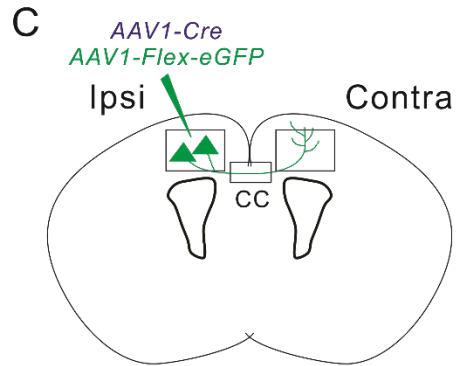

AAV1-Cre/AAV1-Flex-eGFP/Ctip2 5-week-old

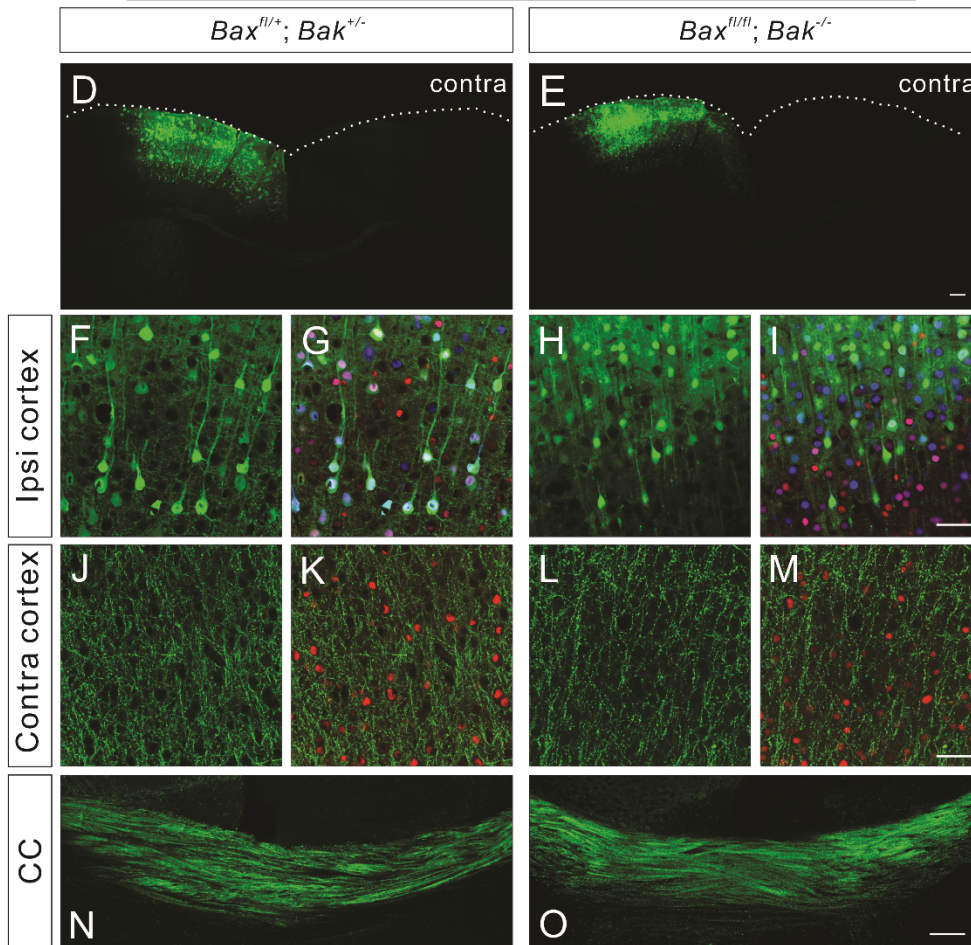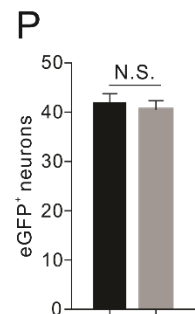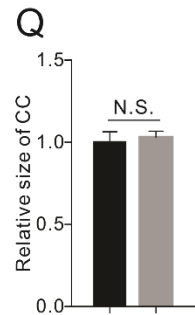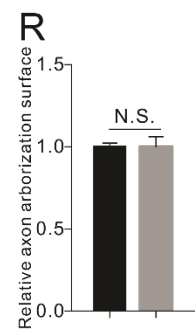

■ *Bax<sup>fl/+</sup>; Bak<sup>+/-</sup>*

■ *Bax<sup>fl/fl</sup>; Bak<sup>-/-</sup>*

**Figure S6. No obvious defects in cortico-cortical axonal tracts in  $Bax^{fl/fl}$ ;  $Bak^{-/-}$ -AAV1-Cre mice (related to Figure 4)**

(A) Experimental design. A mixed virus solution (*AAV1-Cre* and a Cre-dependent eGFP reporter AAV virus) was injected into the motor cortex to delete the floxed *Bax* allele and label CS axons in P4 mice. Brains and spinal cords were analyzed at P12 and 5-week-old stages.

(B) Strategy for conditional deletion of the floxed *Bax* allele in the motor cortex to create  $Bax^{fl/fl}$ ;  $Bak^{-/-}$ -AAV1-Cre mice. Schematic representation of the loxP sequences flanking exons 2–4 of the *Bax* gene. Exons 2–4 are deleted after *AAV1-Cre* mediated recombination. A Cre-dependent eGFP reporter AAV virus is used to label axons of *Bax/Bak*-deficient CS neurons in  $Bax^{fl/fl}$ ;  $Bak^{-/-}$ -AAV1-Cre mice.

(C) Schematic of a coronal section of the brain showing the corpus callosum (CC) fibers and axonal arbors in the contralateral side of the cortex labeled by the AAV virus.

(D–O) Coronal brain sections from 5-week-old mice were immunostained for eGFP (green), *Ctip2* (red), and Cre (blue), showing low magnification images (D and E) and high magnification images (F–O) of boxed areas in C.

(F–I) Ipsilateral side of the cortex from  $Bax^{fl/+}$ ;  $Bak^{+/-}$ -AAV1-Cre (control) (F and G) and  $Bax^{fl/fl}$ ;  $Bak^{-/-}$ -AAV1-Cre (H and I) mice showing GFP<sup>+</sup> CS neurons.

(J–M) Contralateral side of the cortex from control (J and K) and  $Bax^{fl/fl}$ ;  $Bak^{-/-}$ -AAV1-Cre (L and M) mice showing eGFP<sup>+</sup> axonal arbors from the ipsilateral side of the cortex.

(N and O) High magnification view of the CC from the middle boxed area in (C) showing CC fibers from control (N) and  $Bax^{fl/fl}$ ;  $Bak^{-/-}$ -AAV1-Cre (O) mice.

(P) Quantification of eGFP<sup>+</sup> CS neurons showing that similar numbers (P=0.6637) of eGFP<sup>+</sup> neurons were labeled by viruses in control (*Bax*<sup>fl/+</sup>; *Bak*<sup>+/-</sup>-AAV1-Cre, n=8) and *Bax*<sup>fl/fl</sup>; *Bak*<sup>-/-</sup>-AAV1-Cre mice (n=8).

(Q) Relative sizes of CC fibers. CC fibers labeled by AAV viruses were similar (P=0.7349) in size between control (n=8) and *Bax*<sup>fl/fl</sup>; *Bak*<sup>-/-</sup>-AAV1-Cre mice (n=8).

(R) eGFP<sup>+</sup> axon arborization surface areas in the contralateral side of the cortex labeled by AAV viruses were similar between control (n=8) and *Bax*<sup>fl/fl</sup>; *Bak*<sup>-/-</sup>-AAV1-Cre mice (P=0.9505, n=8).

Where “n” represents the number of mice used in each experiment. Scale bars, 50 μm (I and M), 100 μm (O), and 500 μm (E).

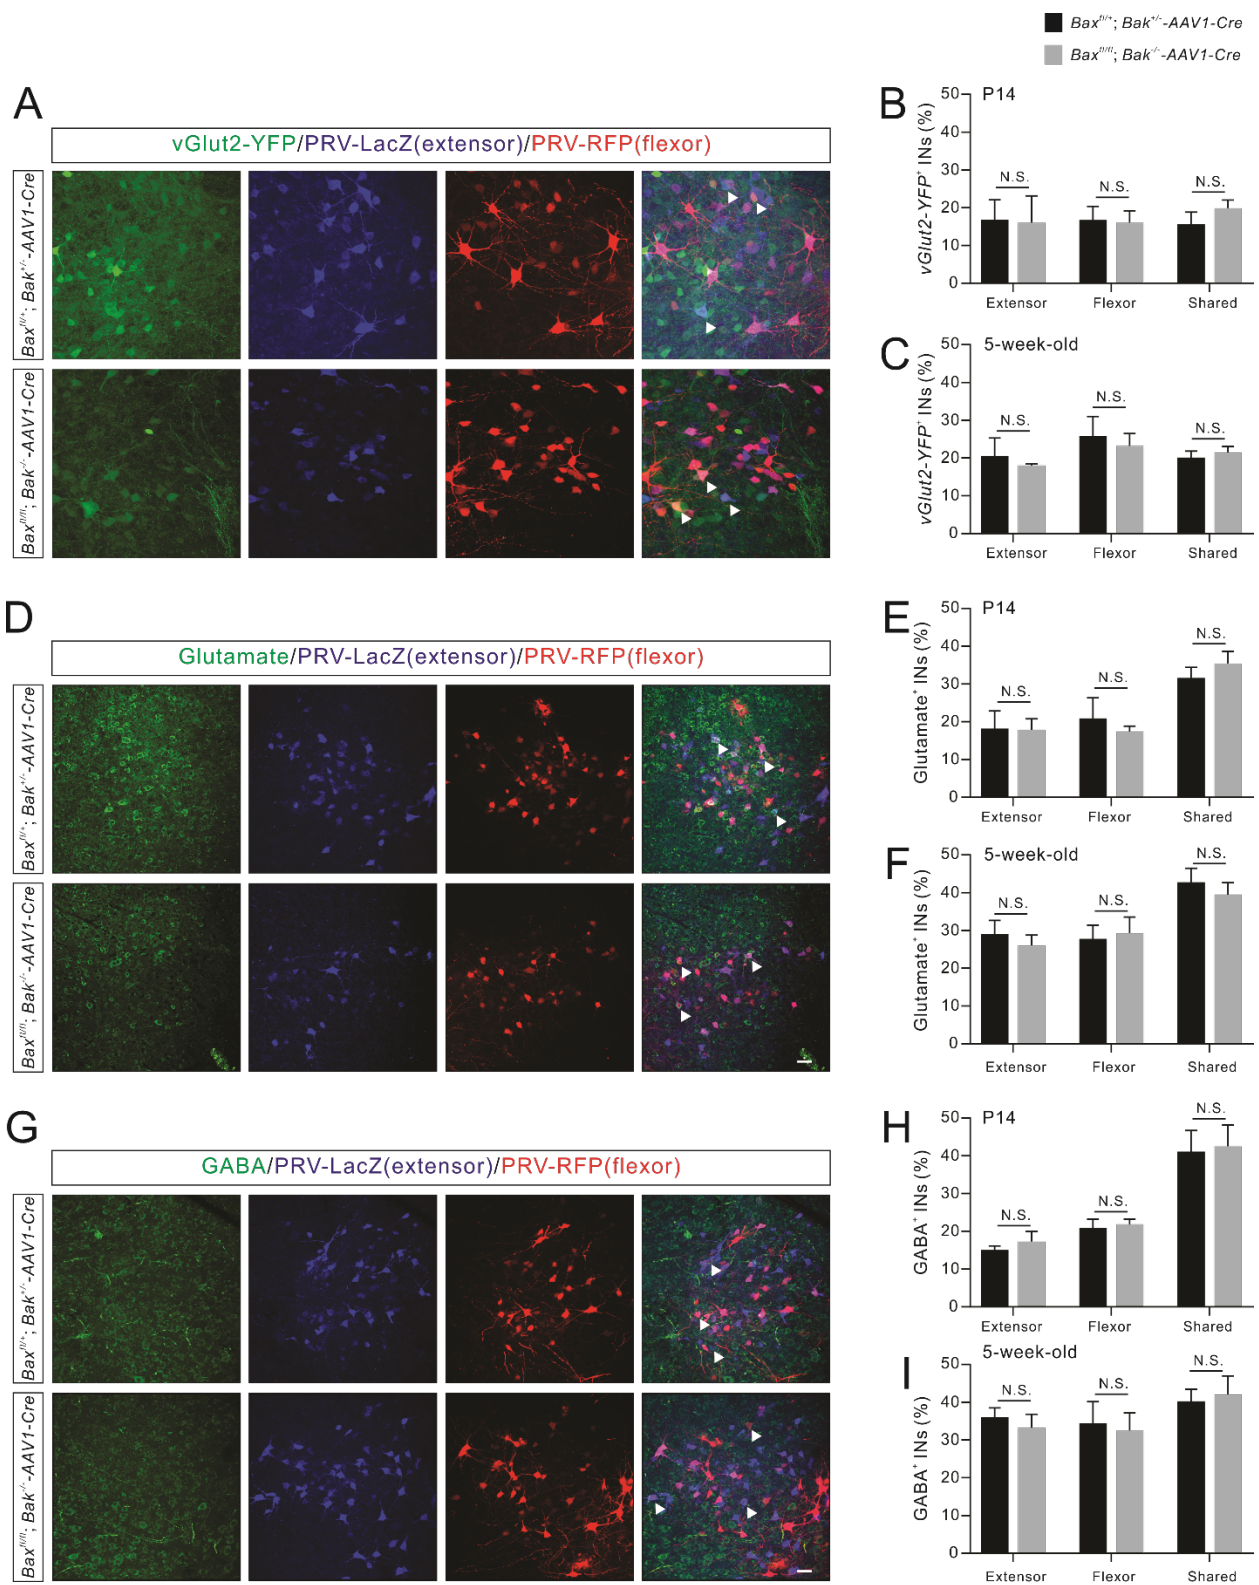

**Figure S7. No obvious defects in IN-MN connectivity in  $Bax^{fl/fl}$ ;  $Bak^{-/-}$ -AAVI-Cre (related to Figure 6)**

(A) Cervical spinal cord sections from P14  $Bax^{fl/+}$ ;  $Bak^{+/-}$ -AAVI-Cre (control, top panels) and  $Bax^{fl/fl}$ ;  $Bak^{-/-}$ -AAVI-Cre mice (bottom panels) mice were immunostained for eGFP (green for  $vGlut2-YFP$ ), LacZ (blue), and RFP (red), showing that subsets of PRV-infected INs are  $vGlut2-YFP$  positive (representative INs indicated by white arrowheads).

(B and C) Similar fractions of INs (extensor,  $P=0.9334$  at P14,  $P=0.6176$  at adult; flexor,  $P=0.8972$  at P14,  $P=0.7129$  at adult; shared  $P=0.3524$  at P14,  $P=0.6525$  at adult) are  $vGlut2-YFP^+$  in P14 (B) and 5-week-old adult (C) control (P14,  $n=8$ ; adult,  $n=7$ ) and  $Bax^{fl/fl}$ ;  $Bak^{-/-}$ -AAVI-Cre mice (P14,  $n=7$ ; adult,  $n=8$ ).

(D) Cervical spinal cord sections from P14 control (top panels) and  $Bax^{fl/fl}$ ;  $Bak^{-/-}$ -AAVI-Cre mice (bottom panels) mice were immunostained for glutamate (green), LacZ (blue), and RFP (red). Subsets of PRV-infected INs are glutamate positive (representative INs indicated by white arrowheads).

(E and F) Similar fractions of INs are glutamate positive (extensor,  $P=0.9507$  at P14,  $P=0.5557$  at adult; flexor,  $P=0.5493$  at P14,  $P=0.8160$  at adult; shared  $P=0.4460$  at P14,  $P=0.5497$  at adult) in P14 (E) and adult (F) control (P14,  $n=7$ ; adult,  $n=6$ ) and  $Bax^{fl/fl}$ ;  $Bak^{-/-}$ -AAVI-Cre mice (P14,  $n=8$ ; adult,  $n=7$ ).

(G) Cervical spinal cord sections from P14 control (top panels) and  $Bax^{fl/fl}$ ;  $Bak^{-/-}$ -AAVI-Cre mice (bottom panels) mice were immunostained for GABA (green), LacZ (blue), and RFP (red), showing subsets of PRV-infected INs are GABA positive (representative INs indicated by white arrowheads).

(H and I) Similar fractions of INs (extensor, P=0.5730 at P14, P=0.5627 at adult; flexor, P=0.7545 at P14, P=0.8174 at adult; shared P=0.8638 at P14, P=0.7817 at adult) are GABA positive in P14 (E) and adult (F) control (P14, n=6; adult, n=9) and *Bax<sup>fl/fl</sup>*; *Bak<sup>-/-</sup>*-*AAV1-Cre* mice (P14, n=8; adult, n=8). Where “n” represents the number of mice used in each experiment. Scale bars, 50  $\mu$ m.



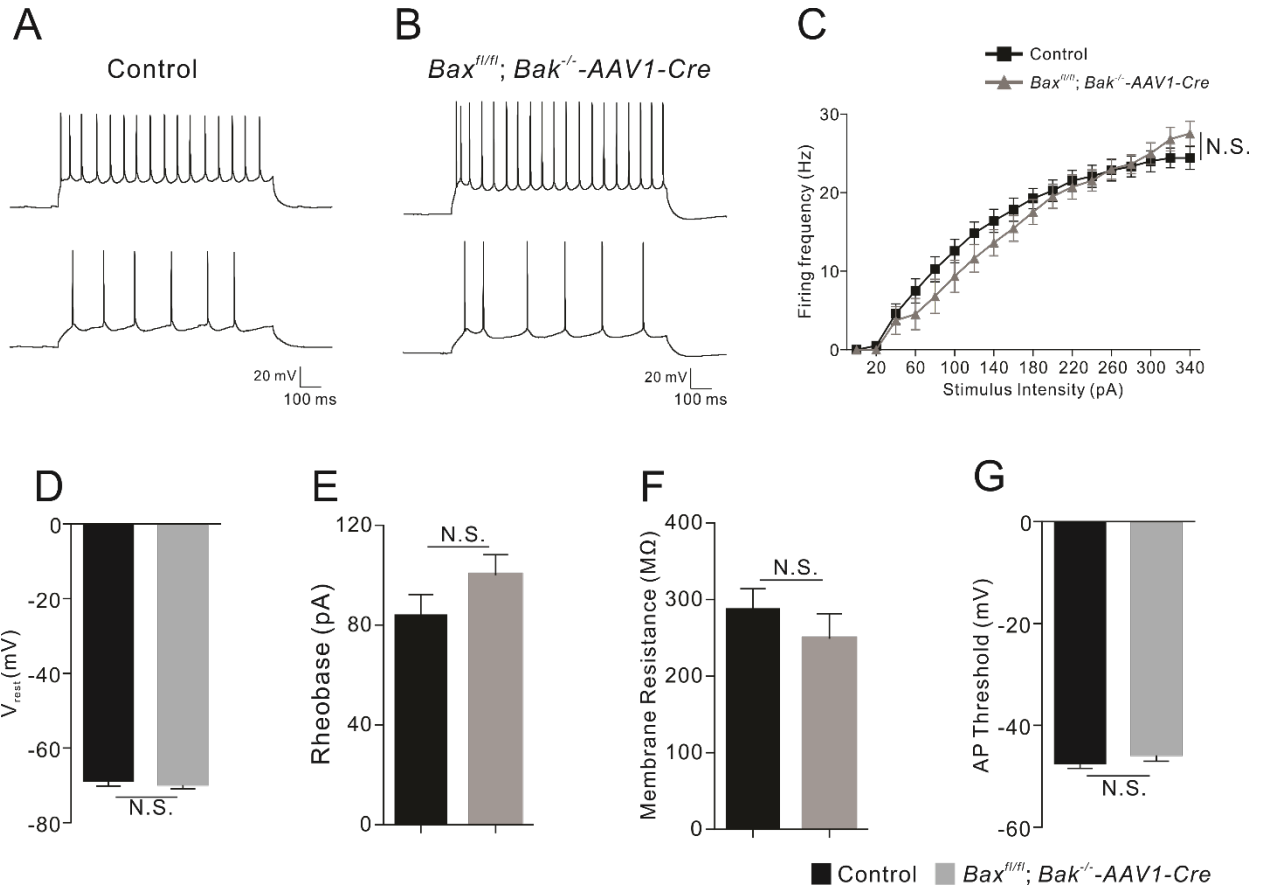

**Figure S8. Normal neuronal excitability in *Bax/Bak*-deficient CS neurons (related to Figure 7)**

(A and B) Examples of action potential discharges evoked in CS neurons in brain slices prepared from control (wild-type mice receiving *AAVI-Cre* injections at P2) (A) and *Bax<sup>fl/fl</sup>; Bak<sup>-/-</sup>-AAVI-Cre* (B) mice during intracellular current injections (100 pA, bottom; 220 pA, top) through the patch clamp electrode.

(C) The two groups exhibited similar ( $P > 0.05$ ) firing frequencies across a range of stimulus intensities *in vitro*.

(D–E) There were no significant effects of *Bax/Bak* deletion on the resting membrane potential (D,  $n = 12$  neurons in each group;  $P = 0.5237$ ) or rheobase (E,  $P = 0.1849$ ) in CS neurons.

(F) There were no significant differences in membrane resistances in CS neurons between control and *Bax<sup>fl/fl</sup>; Bak<sup>-/-</sup>-AAVI-Cre* mice ( $n = 12$  neurons in each group;  $P = 0.3839$ ).

(G) Action potential thresholds were also similar ( $P = 0.2824$ ) between the two experimental groups.

**Supplemental Movie S1. Representative movie showing the performance of an adult  $Bax^{fl/+}$ ;  $Bak^{+/-}$ -AAV1-Cre mouse on the reaching test (related to Figure 8).**

Representative movie showing the performance of an adult  $Bax^{fl/+}$ ;  $Bak^{+/-}$ -AAV1-Cre (AAV1-Cre injection was performed at P2) mouse on the reaching test.

**Supplemental Movie S2. Representative movie showing the performance of an adult  $Bax^{fl/fl}$ ;  $Bak^{-/-}$ -AAV1-Cre mouse on the reaching test (related to Figure 8).**

Representative movie showing the performance of an adult  $Bax^{fl/fl}$ ;  $Bak^{-/-}$ -AAV1-Cre mouse (AAV1-Cre injection was performed at P2) on the reaching test.
